# Supplementary material
Source: MDPI journal article supplement (https://www.mdpi.com/2674-0583/2/2/10)
Supplement: s1 [file s1]

Archive with 2 entries (2 files):
- synbio-2818207-supplemental.pdf
- synbio-2818207.mov
